# Supplementary material for: Controllable fabrication of ternary ZnIn2S4 nanosheet array film for bulk heterojunction solar cells
Source: Royal Society of Chemistry journal article supplement (doi:10.1039/c3ra40322j), 2013-01-01
Supplement: c3ra40322j.pdf [file c3ra40322j.pdf]

Supporting Information for:

## Controllable Fabrication of Ternary $\text{ZnIn}_2\text{S}_4$ Nanosheet Array Film for Bulk Heterojunction Solar Cells

Huimin Jia<sup>a</sup>, Weiwei He<sup>a</sup>, Yan Lei<sup>a</sup>, Xuewu Chen<sup>a</sup>, Yong Xiang<sup>b</sup>, Shu Zhang<sup>b</sup>, Woon Ming Lau<sup>c</sup>, Zhi Zheng<sup>a\*</sup>

<sup>a</sup>Institute of Surface Micro and Nano Materials, Xuchang University, Xuchang 461000, P. R. China.

<sup>b</sup>State Key Laboratory of Electronic Thin Film & Integrated Devices, School of Energy Science and Engineering, University of Electronic Science and Technology of China, Sichuan 611731, P. R. China.

<sup>c</sup>Chengdu Green Energy and Green Manufacturing R&D Center, Sichuan 610207, P. R. China.

Corresponding Authors: zhengzhi99999@gmail.com

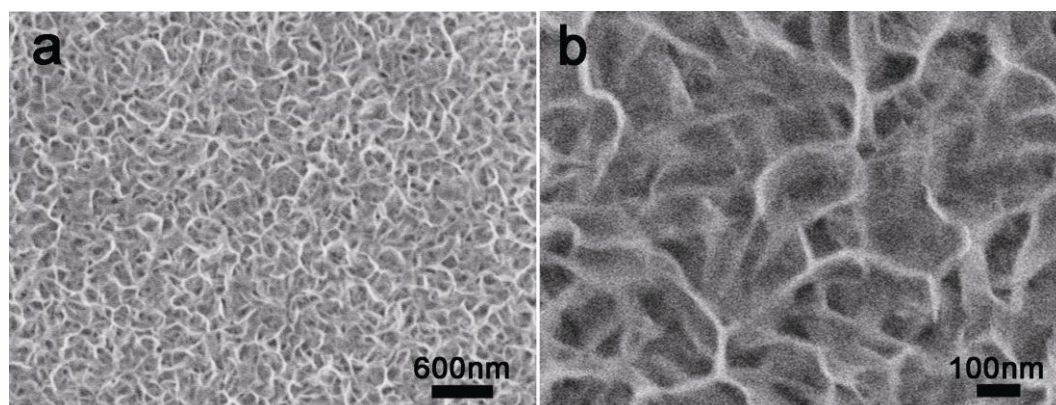

**Figure S1.** SEM images of as-prepared  $\text{ZnIn}_2\text{S}_4$  nanosheet film by solvothermal treatment of a 20 nm Zn/In film and 0.5 mmol S powders at 180 °C for 24 h.

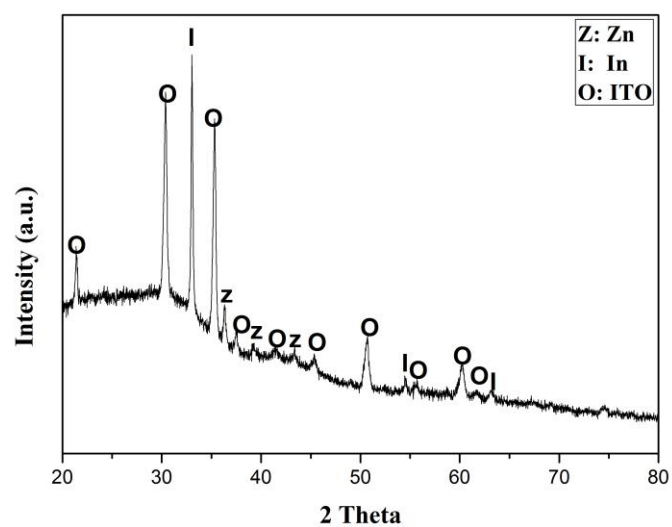

**Figure S2.** X-ray diffraction (XRD) pattern of original zinc/indium film with thickness of 80 nm by magnetron sputtering before solvothermal treatment.

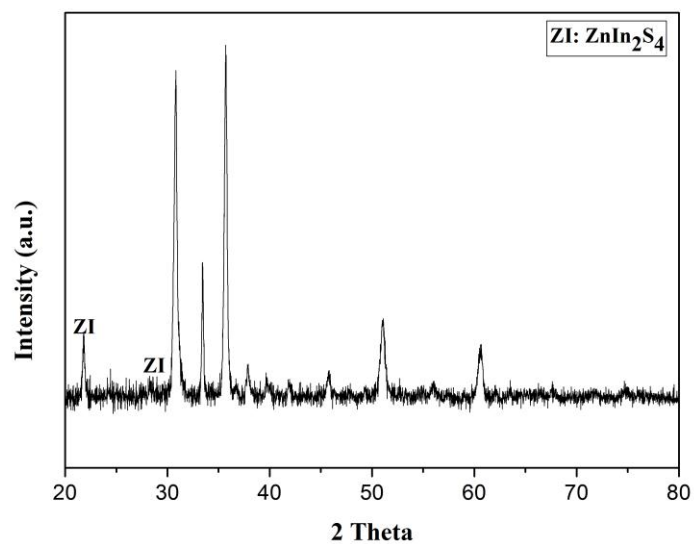

**Figure S3.** X-ray diffraction (XRD) pattern of the ZnIn<sub>2</sub>S<sub>4</sub> film obtained by solvothermal treatment of 80 nm thick Zn/In bimetallic film and 0.5 mmol S powders at 180°C for 12 h.

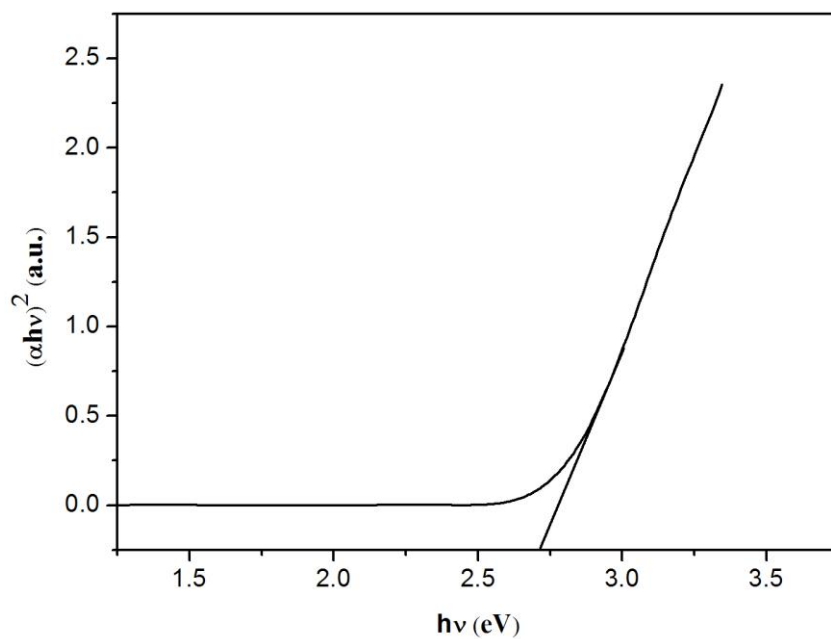

**Figure S4.** The corresponding  $(\alpha h\nu)^2$  vs.  $h\nu$  curve.

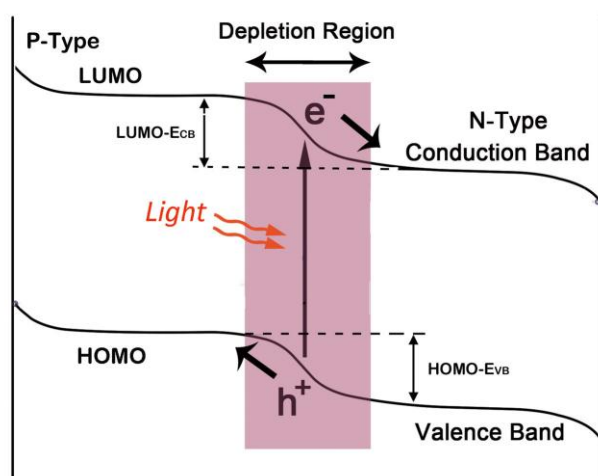

**Figure S5.** Schematic drawing of the donor and acceptor energy levels.
